# Supplementary material
Source: Springer Nature journal article supplement (https://www.springermedizin.de/resource/supplementary/12958_2010_752_MOESM1_ESM.pdf/9568402)

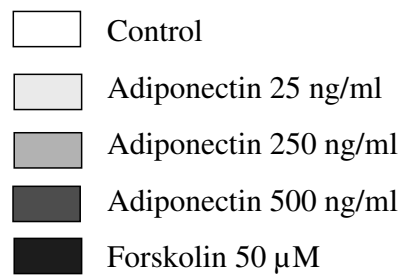

**A.** BeWo cells

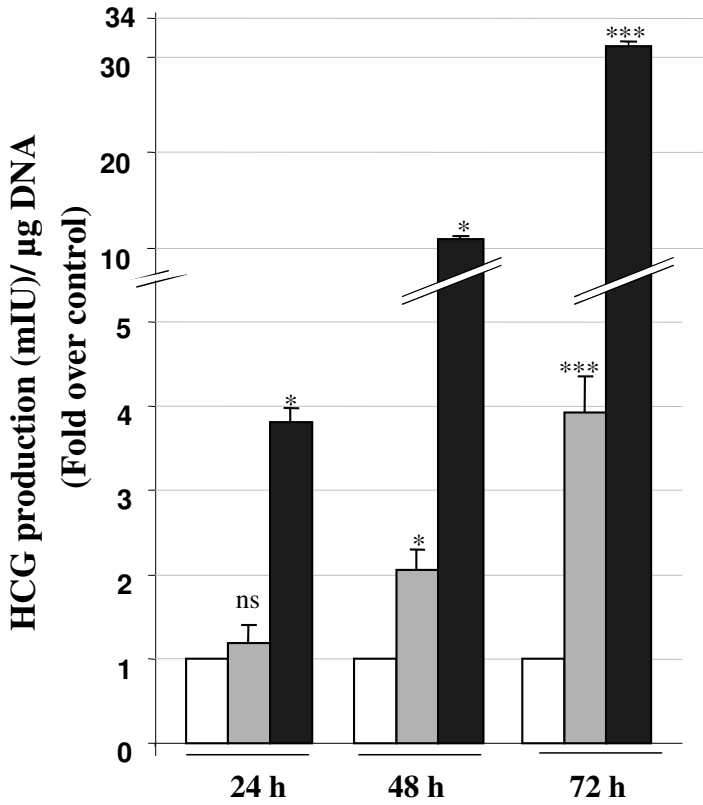

**B.** BeWo cells

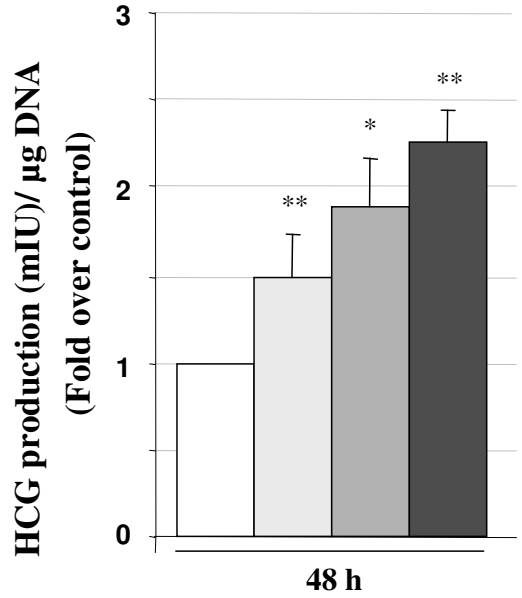

**C.** Villous CT (5-6 weeks)

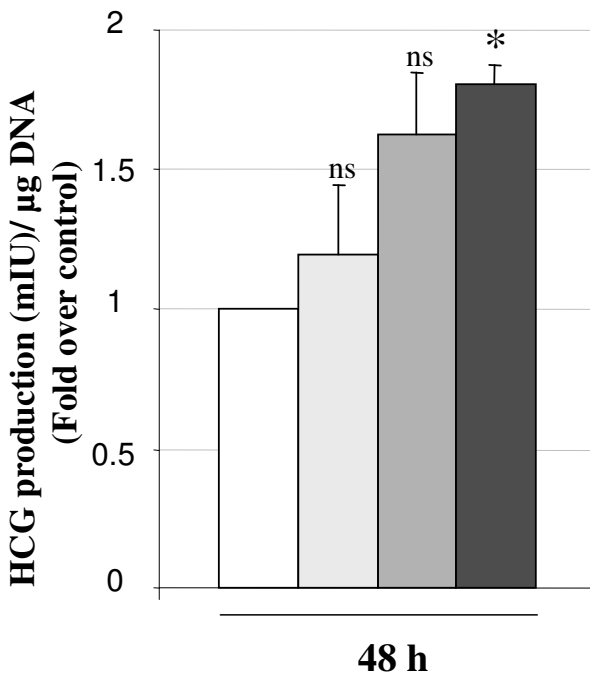

**D.** Villous CT (10-11 weeks)

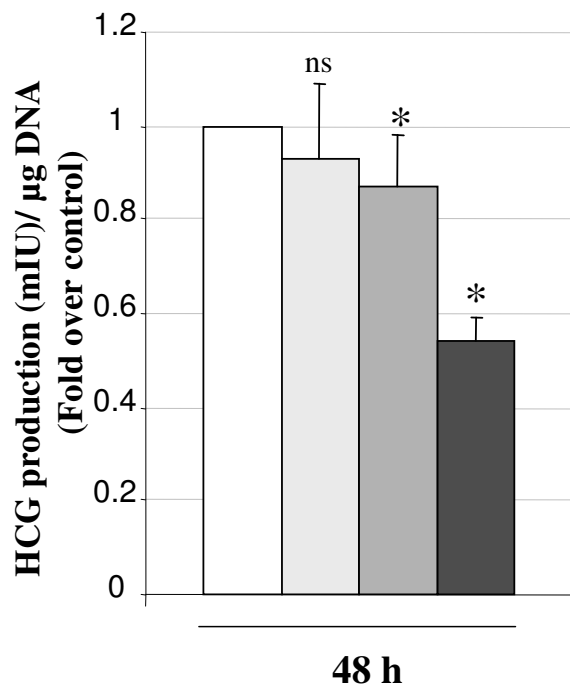

Supplement: MOESM1 [file 9568402]
